# Supplementary material
Source: Springer Nature journal article supplement (https://edoc.mdc-berlin.de/id/eprint/26500/2/26500suppl.zip)
Supplement: MOESM1 [file 41467_2026_73132_MOESM1_ESM.pdf › 26500suppl/41467_2026_73132_MOESM1_ESM.pdf]

# Two-dimensional HRS condensates drive the assembly of flat clathrin lattices on endosomes

Markku Hakala<sup>1,2</sup>, Satish Babu Moparthi<sup>3</sup>, Iva Ganeva<sup>4</sup>, Mehmet Gül<sup>5,6</sup>, César Bernat-Silvestre<sup>1</sup>, Carlos Marcuello<sup>7</sup>, Javier Espadas<sup>1</sup>, Adai Colom<sup>7</sup>, Mikhail Kudryashev<sup>5,8</sup>, Wanda Kukulski<sup>4</sup>, Stéphane Vassilopoulos<sup>3</sup>, Marko Kaksonen<sup>1</sup>, Aurélien Roux<sup>1</sup>

<sup>1</sup>Department of Biochemistry, University of Geneva, Switzerland

<sup>2</sup>Helsinki Institute of Life Sciences and the Institute of Biotechnology, University of Helsinki, Finland

<sup>3</sup>Sorbonne Université, INSERM, Institute of Myology, Centre of Research in Myology, UMRS 974, Paris, France.

<sup>4</sup>Institute of Biochemistry and Molecular Medicine, University of Bern, Bern, Switzerland

<sup>5</sup>In situ Structural Biology, Max Delbrück Center for Molecular Medicine in the Helmholtz Association (MDC), Berlin, Germany

<sup>6</sup>Institute of Chemistry and Biochemistry, Freie Universität Berlin, Germany

<sup>7</sup>Biofisika Institute (CSIC, UPV/EHU) and Department of Biochemistry and Molecular Biology, University of the Basque Country, Leioa, Spain

<sup>8</sup>Institute of Medical Physics and Biophysics, Charité-Universitätsmedizin Berlin, Germany

Correspondence to [Aurelien.Roux@unige.ch](mailto:Aurelien.Roux@unige.ch), and [Marko.Kaksonen@unige.ch](mailto:Marko.Kaksonen@unige.ch).

## Supplementary information

- Supplementary figures 1-10
- Supplementary Tables 1-4
- Uncropped Western blots

## Supplementary Figures

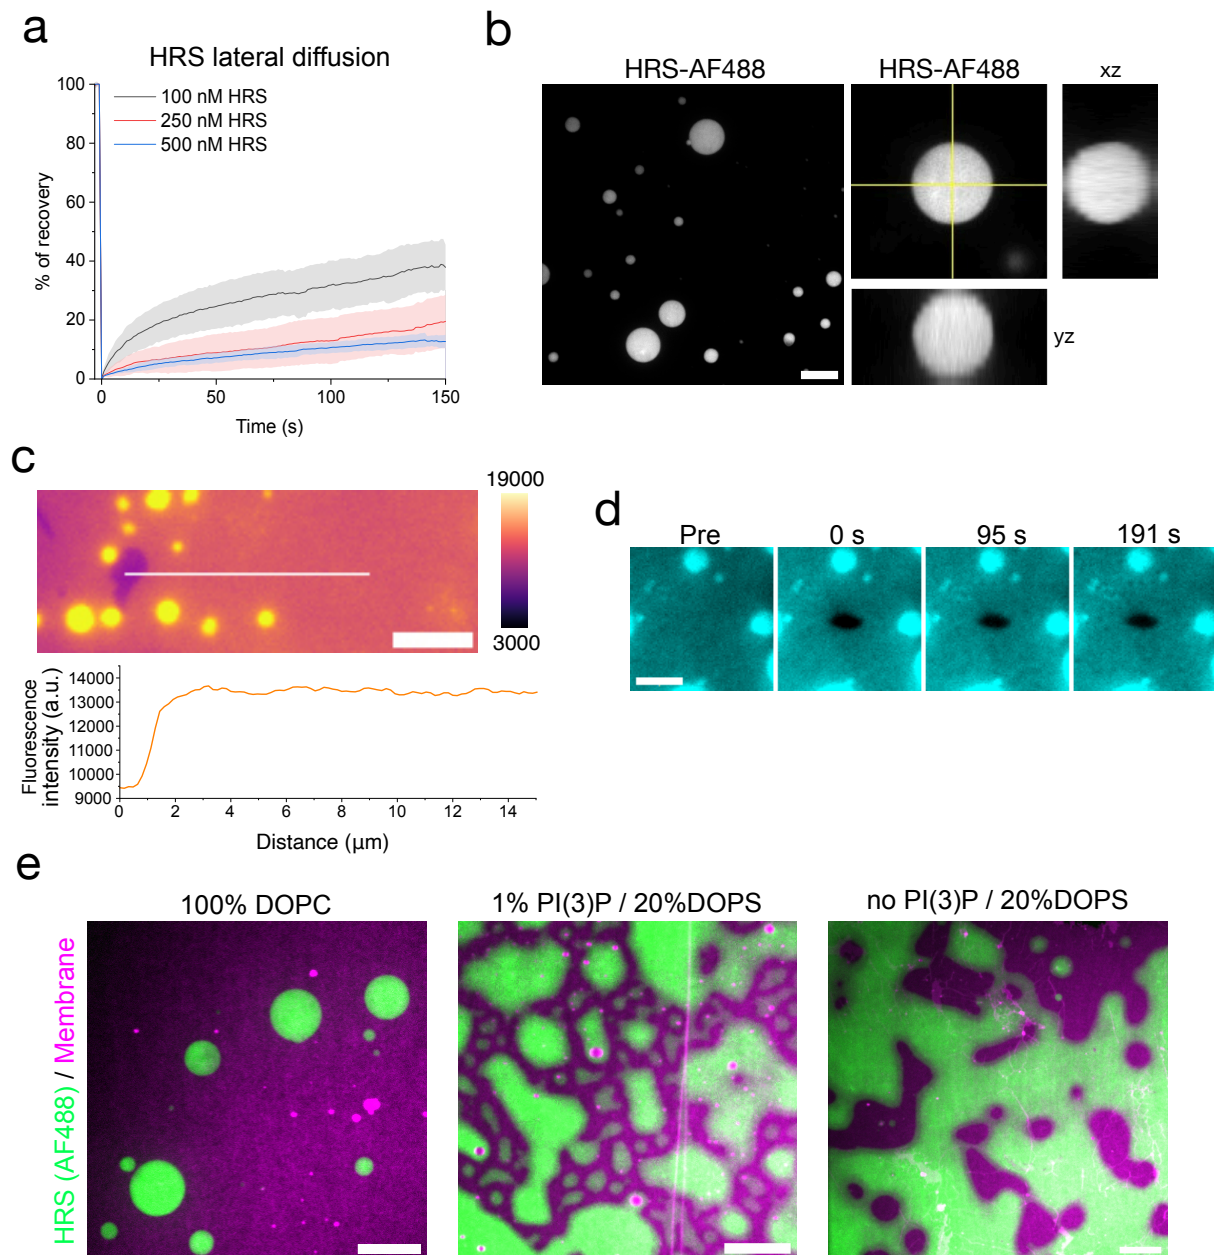

### Supplementary Figure 1

**a**, FRAP of AlexaFluor-568 labeled HRS on the SLB. Data is a mean of 20 measurements (100 nM HRS), 18 measurements (250 nM HRS), and eight measurements (500 nM HRS) with standard deviations shown. **b**, Representative fluorescence microscopy images of 2  $\mu\text{M}$  AlexaFluor-488 labeled HRS in 20 mM HEPES, pH 7.2, 125 mM potassium acetate, and 1 mM magnesium acetate. The scale bar is 10  $\mu\text{m}$ . Orthogonal views of HRS condensate are shown. **c**, A fluorescent microscopy image of HRS condensate wetting the membrane with a fluorescence intensity heatmap and a line profile analysis of HRS fluorescence intensity over the condensate.

A scale bar is 10  $\mu\text{m}$ . **d**, Representative time-lapse images of FRAP experiments of a 2  $\mu\text{M}$  HRS (AlexaFluor-488 labeled) droplet on SLB membrane. The scale bar is 5  $\mu\text{m}$ . **e**, 2  $\mu\text{M}$  HRS (AlexaFluor-488 labeled, green) on SLB (magenta) containing 100% DOPC (left), 29% DOPC, 20% DOPE, 20% DOPS, 1% PI(3)P, and 30% cholesterol (middle), and 30% DOPC, 20% DOPE, 20% DOPS, and 30% cholesterol (right). All membranes are supplemented with 0.05% DOPE Atto-647n. The scale bar is 10  $\mu\text{m}$ . The experiment was repeated three times.

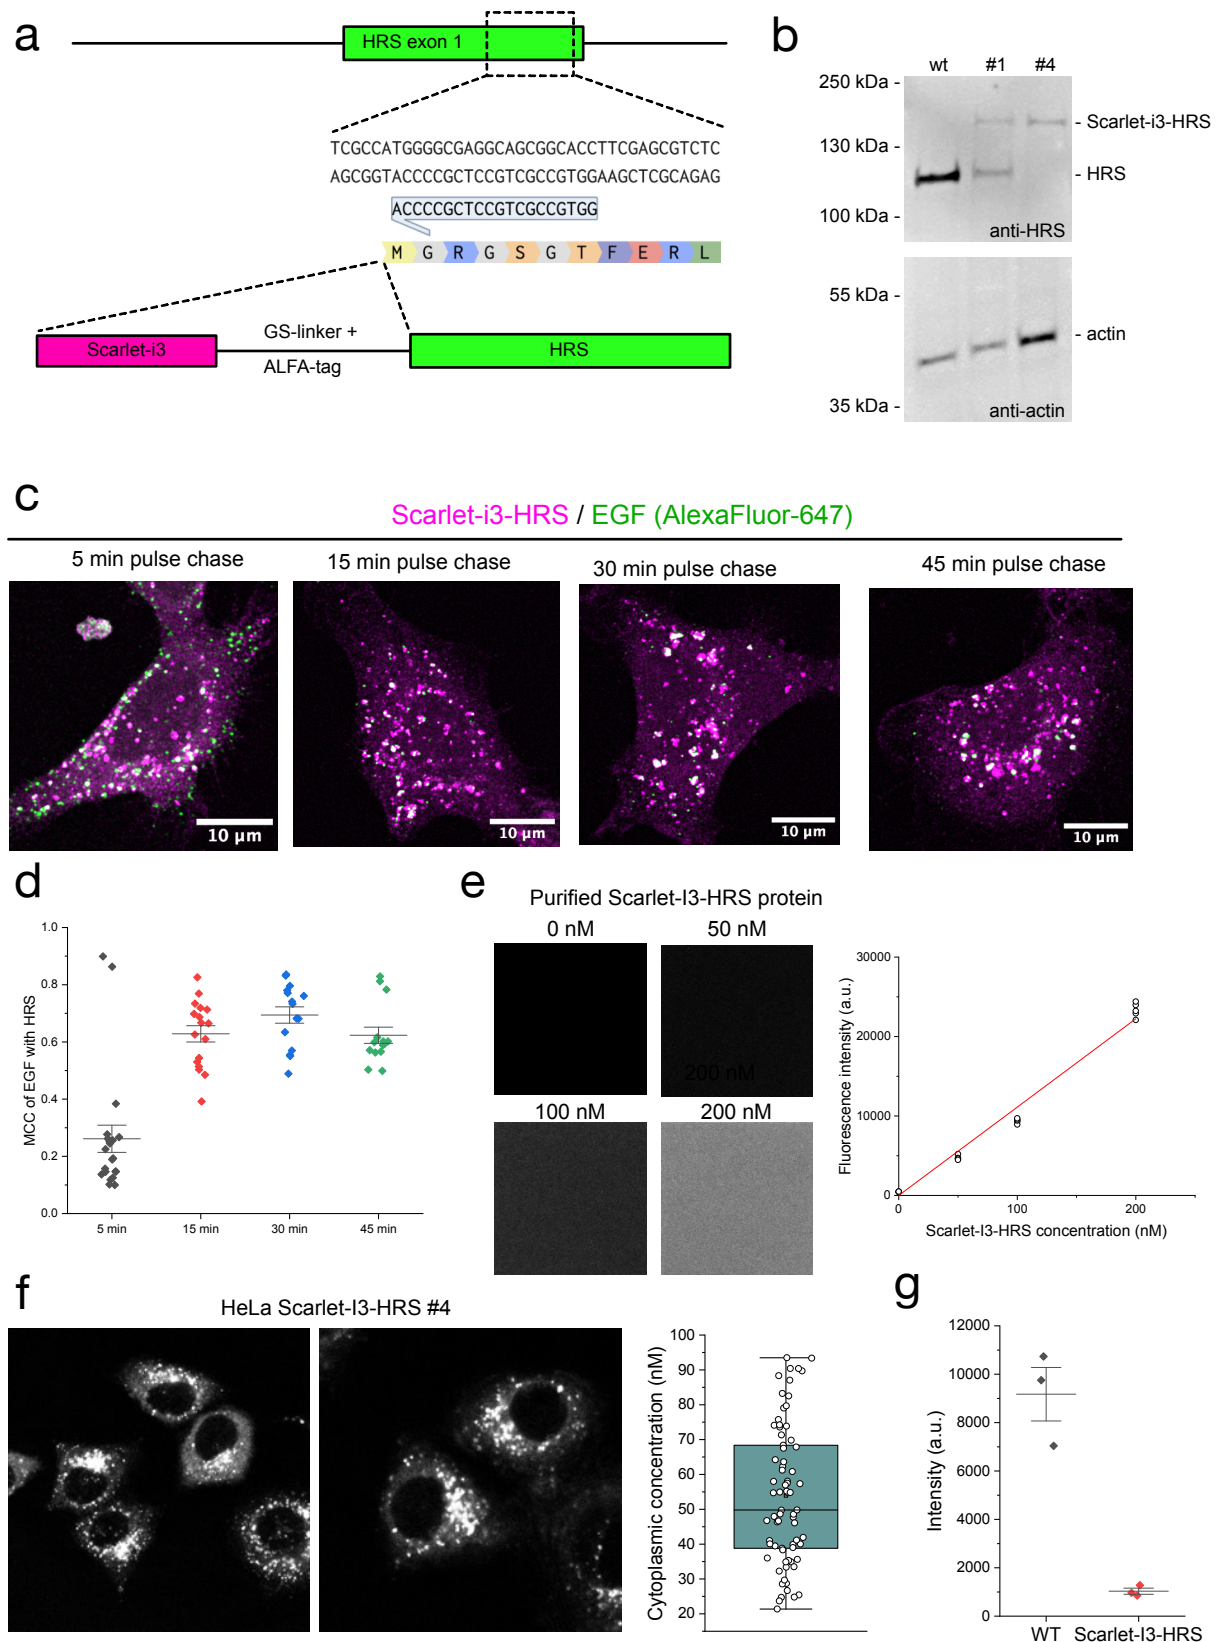

**Supplementary Figure 2**

**a**, A schematic presentation of the CRISPR-Cas9 knock-in strategy (see Methods for details). **b**, Western blot of control HeLa cells and CRISPR-Cas9 mScarlet-I3-HRS knock-in cell lines. Different clonal lines are indicated with #1 and #4. **c**, Representative fluorescence microscopy



images of mScarlet-I3-HRS(#4) (magenta) cell lines with 5 min, 15 min, 30 min, or 45 min pulse of EGF-AlexaFluor-647 (green). Scale bars are 10  $\mu\text{m}$ . **d**, Mander's colocalization coefficients of EGF-AlexaFluor-647 colocalizing with HRS. **e**, Representative confocal microscopy images of purified Scarlet-I3-HRS (0 nM, 50 nM, 100 nM, 200 nM) diluted with FluoroBrite media. A scatter plot of Scarlet-I3-HRS protein fluorescence over protein concentration. Data are from five experiments with a linear fit (red line) shown. **f**, Representative images of HeLa MZ Scarlet-I3-HRS(#4) cell lines imaged with the same settings as Scarlet-I3-HRS in panel e. A concentration of cytoplasmic Scarlet-I3-HRS was calculated based on fluorescence values measured from the cytoplasmic pool of Scarlet-I3-HRS and compared to a line fit in panel e. A box plot with median value, 25<sup>th</sup> and 75<sup>th</sup> percentiles, and the data range shown. The experiment was repeated two times. **g**, Expression levels of endogenous HRS and tagged Scarlet-I3-HRS in HeLa MZ cells and clonal cell line #4 were measured with Western blot and normalized with anti-tubulin staining as a loading control. The experiment was repeated three times.

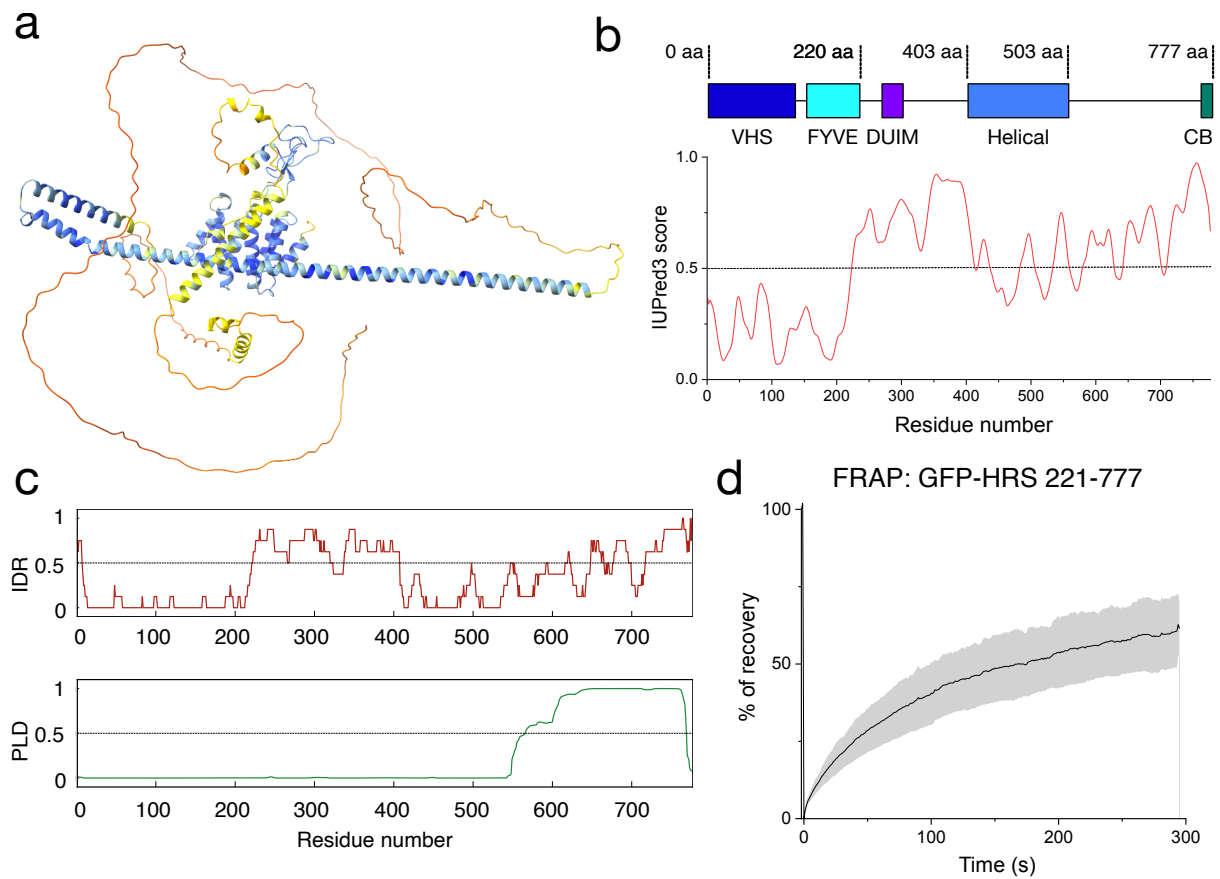

**Supplementary Figure 3**

**a**, An AlphaFold3 prediction of human HRS structure. **b**, Human HRS domain structure and IUPred3 prediction of unstructured regions in HRS protein. **c**, A MolPhase prediction of intrinsically disordered regions (IDR) and prion-like domains (PLD) in human HRS. **d**, FRAP of GFP-HR221-777 transiently expressed in HeLa cells. The data represent a mean of 20 measurements with a standard deviation shown.

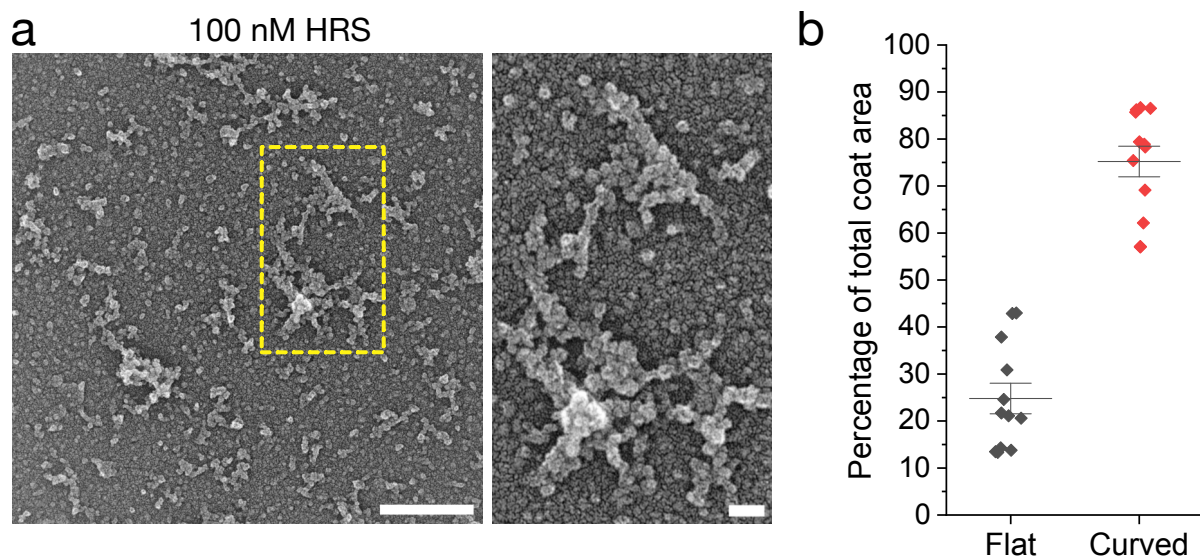

#### Supplementary Figure 4

**a**, A representative PREM image of 100 nM HRS reconstituted on SLB. Scale bar is 300 nm for the larger image and 50 nm for the zoom-in. **b**, The percentage of flat and curved clathrin coats in PREM samples reconstituted with 500 nM HRS and 200 nM clathrin. Each data point represents an individual image from two different sample replicates.

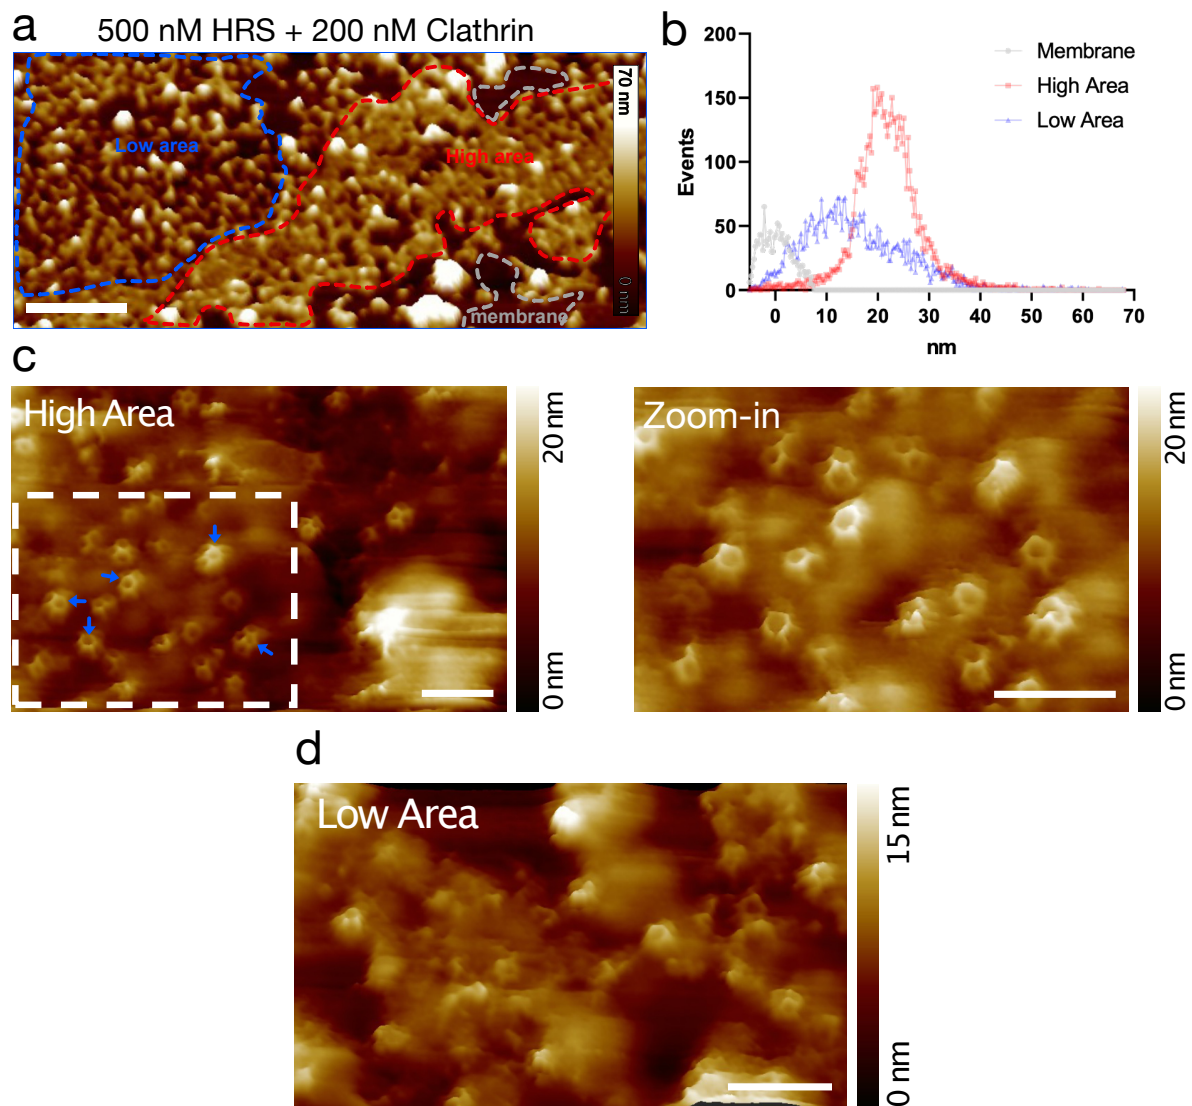

**Supplementary Figure 5**

**a**, A representative HS-AFM image of HRS-clathrin coat on SLB. The scale bar is 1  $\mu\text{m}$ . **b**, A histogram of coat thickness. Thickness per pixel was measured from the regions indicated with respective colors in the HS-AFM image in panel **a**. **c**, A high-resolution image of the clathrin coat at the thick coat region (high area). The scattered box indicates the region in the zoom-in image. Scale bars are 200 nm. Blue arrows indicate recognized hexagons. **d**, A high-resolution image of the clathrin coat on the thin coat region (low area). A scale bar is 200 nm.

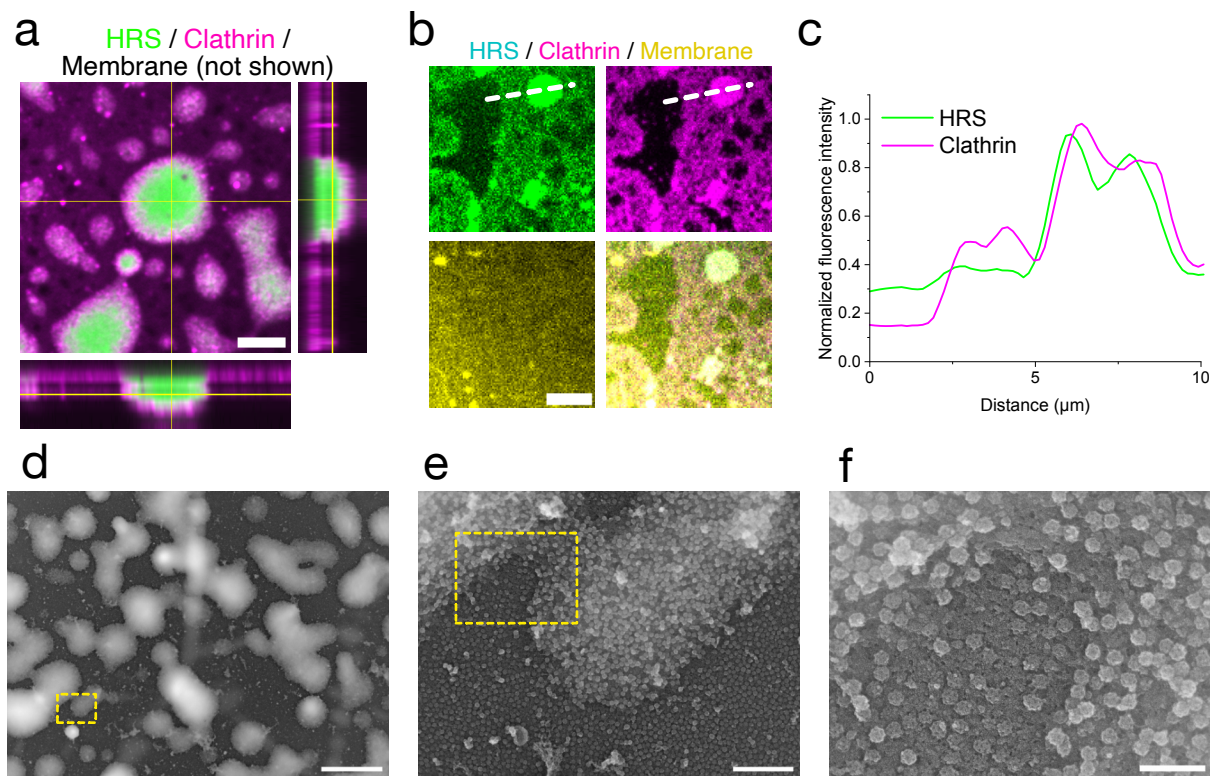

### Supplementary Figure 6

**a**, A representative fluorescence microscopy image with orthogonal views of 2  $\mu\text{M}$  HRS (AlexaFluor-488 labeled, green) and 200 nM clathrin (AlexaFluor-568 labeled, magenta) on SLB. The scale bar is 5  $\mu\text{m}$ . **b**, Representative fluorescence microscopy images of 2  $\mu\text{M}$  HRS (AlexaFluor-488 labeled, green) and 200 nM clathrin (AlexaFluor-568 labeled, magenta) on SLB (yellow), forming clathrin-coated two-dimensional condensates. LD=low-density HRS, HD=high-density HRS, D=droplet condensate. The scale bar is 10  $\mu\text{m}$ . **c**, Line profile analysis of AlexaFluor-488 labeled HRS and AlexaFluor-568 labeled clathrin over three HRS populations on supported bilayers in panel b. **d-f**, PREM images of clathrin-coated spherical HRS condensates reconstituted with 2  $\mu\text{M}$  HRS and 200 nM clathrin. **g-h**, PREM images of clathrin-coated two-dimensional HRS condensates reconstituted with 2  $\mu\text{M}$  HRS and 200 nM clathrin. Scale bars are 10  $\mu\text{m}$  (d), 1  $\mu\text{m}$  (e) and 300 nm (f-h).



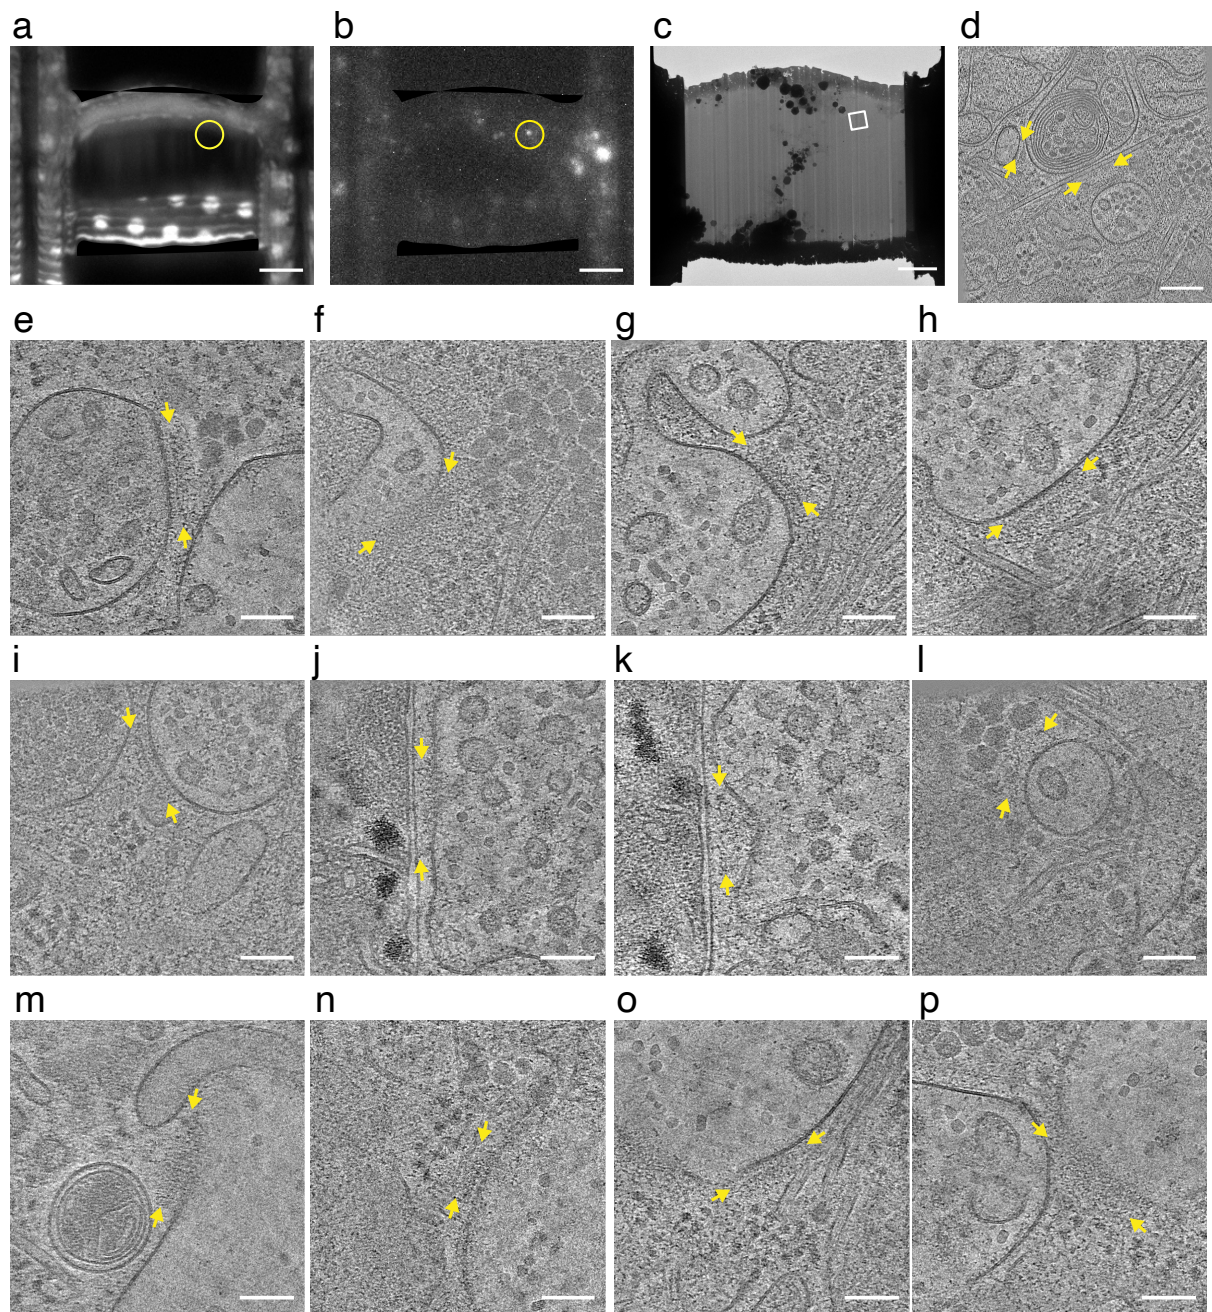

### Supplementary Figure 7

**a-d**, The cryo-CLEM workflow for the acquisition of the data shown in Figure 6a-c. **a**, An image of the lamella after rough milling, acquired by iFLM in reflection mode. **b**, A fluorescence image of the same lamella acquired by iFLM in fluorescence mode, showing the signal of AlexaFluor-647 EGF. The yellow circle indicates the target signal. **c**, A cryo-EM overview of the final lamella. The white square indicates the area of acquisition of the tomogram shown in panel d and Figure 6a. **d**, A virtual slice through the tomogram acquired as indicated in panel c. Note that this slice corresponds to a different z-position than the one shown in Figure 6a, and is rotated by 180° relative to Figure 6a. **e-p**, All regions with a putative protein coat on endosomes (yellow arrows) identified in tomograms acquired similarly as indicated by the workflow in panels a-d. Scale bars are 5  $\mu\text{m}$  (a-b), 3  $\mu\text{m}$  (c), 500 nm (d), and 100 nm (e-p).



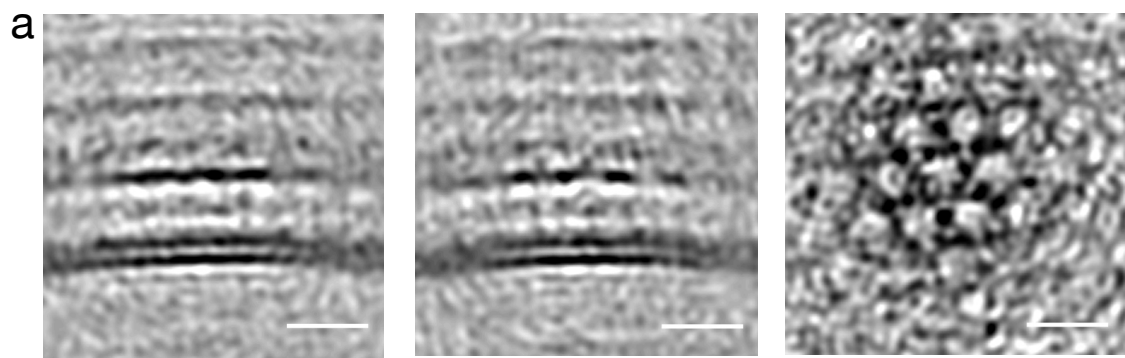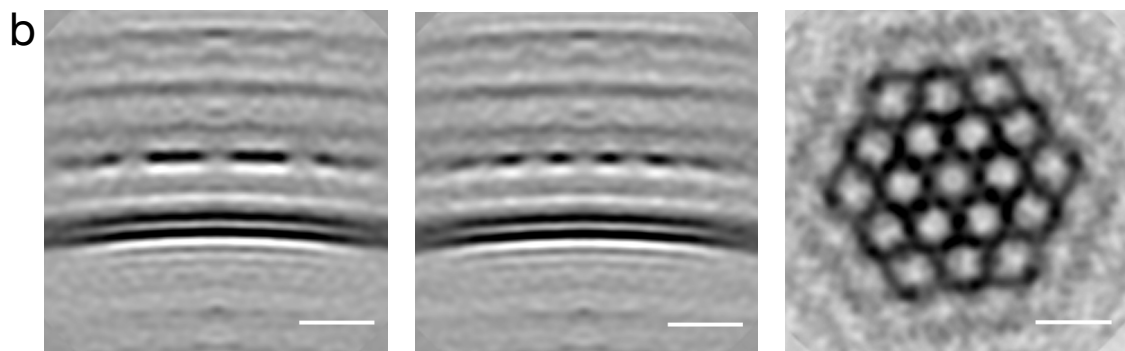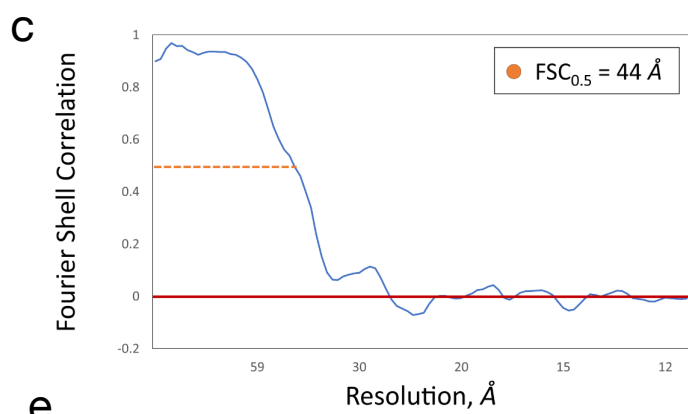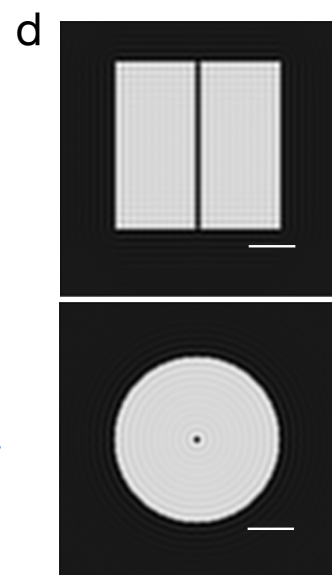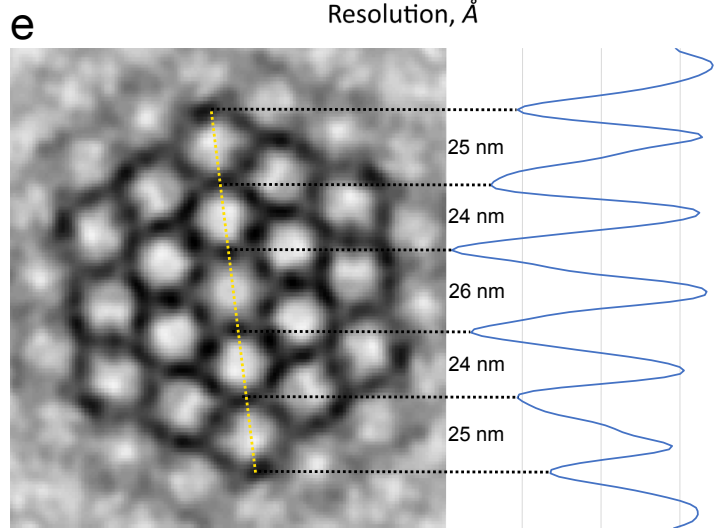

### Supplementary Figure 8

**a**, Side views (XZ and YZ) and top view of the initial structure, obtained using the final 440 subvolumes without symmetry applied. Scale bars are 20 nm for side view images and 40 nm for top-view images. **b**, Side views (XZ and YZ) and top view of the refined structure, obtained using the final 440 subvolumes, the mask shown in **d** and with C6 symmetry applied. Scale bars are 20 nm for side view images and 40 nm for top view images. **c**, A Fourier Shell Correlation (FSC) graph. **d**, The mask used for the refinement. **e**, The analysis of vertex-to-vertex distance of hexagonal lattice.

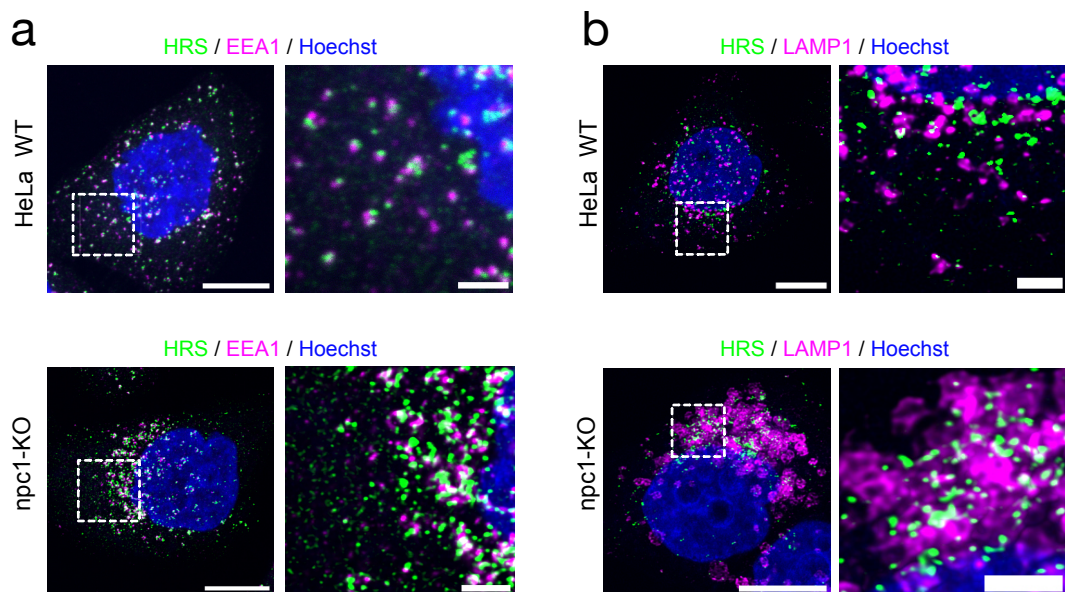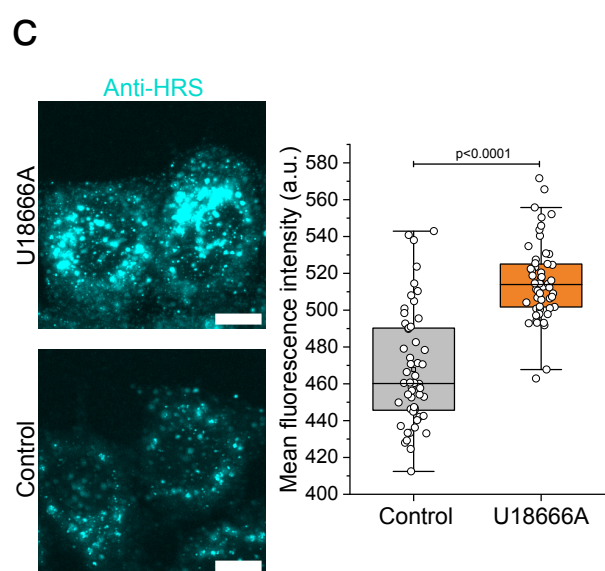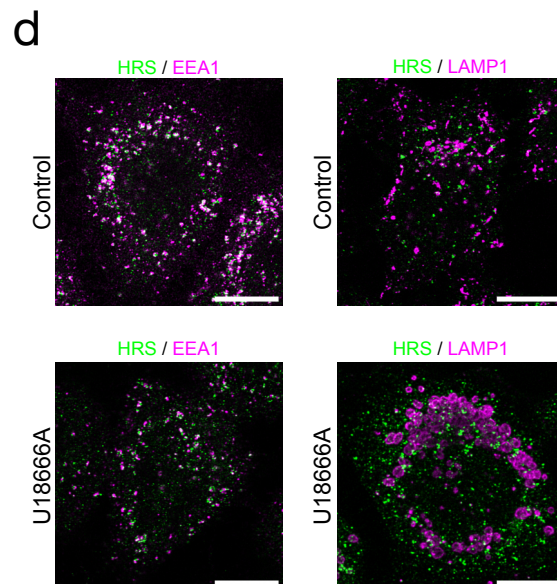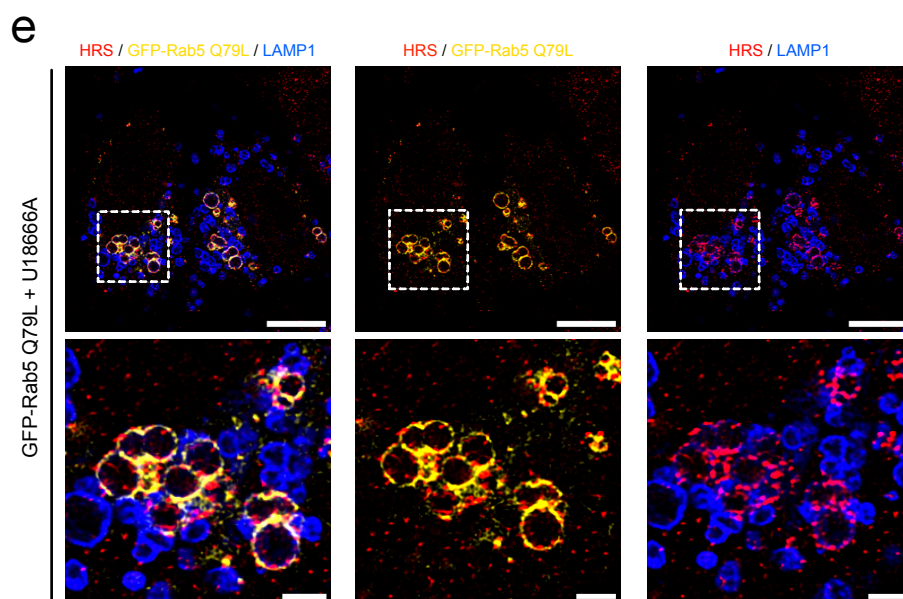

### Supplementary Figure 9

**a**, A representative fluorescence microscopy image of HeLa wild type and NPC1 knockout cells stained with HRS (green) and EEA1 (magenta) antibodies. **b**, A representative fluorescence microscopy image of HeLa wild type and NPC1 knockout cells stained with HRS (green) and LAMP1 (magenta) antibodies. In panels a-b, scale bars are 5  $\mu\text{m}$  for larger images and 2  $\mu\text{m}$  for zoom-in images. Experiment was repeated three times. **c**, Representative fluorescence microscopy images of HeLa control cells and cells treated with U18666A stained with HRS antibody (cyan). Scale bars are 10  $\mu\text{m}$ . Mean HRS fluorescence intensity in U18666A treated and control HeLa cells. Experiments was repeated three times. **d**, Representative images of control HeLa cells and U18666A drug-treated cells with HRS, EEA1, and LAMP1 immunofluorescence staining. Scale bars are 20  $\mu\text{m}$ . **e**, A representative fluorescence microscopy image of HeLa cells transfected with GFP-Rab5 Q79L mutant (yellow) and treated with U18666A, and stained HRS (red) and LAMP1 (blue) antibodies. Scale bars are 5  $\mu\text{m}$  for larger images and 2  $\mu\text{m}$  for zoom-in images. The statistical test in panel c is the Welch's t-test.

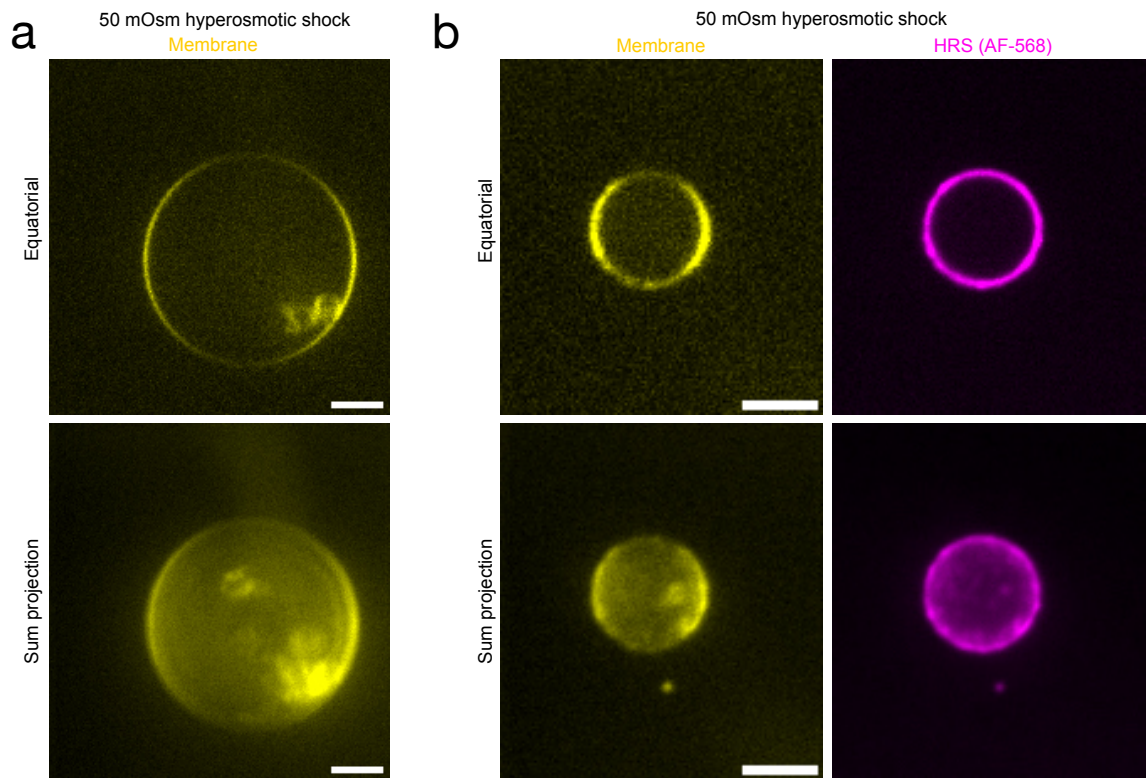

**Supplementary Figure 10**

**a**, GUV (yellow) containing 30% cholesterol under hyperosmotic shock. The equatorial plane and sum projection are shown. **b**, GUV (yellow) containing 30% cholesterol incubated with 500 nM HRS (AlexaFluor-568 labeled, magenta) under hyperosmotic shock. The equatorial plane and sum projection are shown. Scale bars are 5  $\mu\text{m}$ .

## Supplementary Tables

**Supplementary Table 1.** Lipids used in this study. Their abbreviation, full name, commercial source and catalog numbers are mentioned.

| Abbreviation         | Full name                                                       | Source              | Catalog #   |
|----------------------|-----------------------------------------------------------------|---------------------|-------------|
| DOPC                 | 1,2-dioleoyl-sn-glycero-3-phosphocholine                        | Avanti Polar Lipids | 850375      |
| DOPE                 | 1,2-dioleoyl-sn-glycero-3-phosphoethanolamine                   | Avanti Polar Lipids | 850725      |
| DOPS                 | 1,2-dioleoyl-sn-glycero-3-phospho-L-serine                      | Avanti Polar Lipids | 840035      |
| PI(3)P               | 1,2-dioleoyl-sn-glycero-3-phospho-(1'-myo-inositol-3'-phosphate | Avanti Polar Lipids | 850150      |
| Cholesterol          | cholesterol (plant)                                             | Avanti Polar Lipids | 700100      |
| TopFluor-cholesterol | 23-(dipyrrometheneboron difluoride)-24-norcholesterol           | Avanti Polar Lipids | 810255      |
| DOPE Atto-647n       | Atto 647n 1,2-Dioleoyl-sn-glycero-3-phosphoethanolamine         | Attotec             | AD 647N-161 |

**Supplementary Table 2.** Lipid compositions used in this study. Lipid mix number as referred in text, key features, and full composition with molar percentages are listed.

| Lipid mix # | Key features                                      | Full composition                                                      | Mol%                   |
|-------------|---------------------------------------------------|-----------------------------------------------------------------------|------------------------|
| # 1         | 1% PI(3)P / 15% cholesterol                       | DOPC:DOPE:DOPS:PI(3)P:cholesterol:DOPE Atto-647n                      | 44:20:20:1:15:0.05     |
| # 2         | 0% PI(3)P, 20% DOPS                               | DOPC:DOPE:DOPS:cholesterol:DOPE Atto-647n                             | 45:20:20:15:0.05       |
| # 3         | 1% PI(3)P / 0% cholesterol                        | DOPC:DOPE:DOPS:PI(3)P: DOPE Atto-647n                                 | 56:20:20:1:0.05        |
| # 4         | 1% PI(3)P / 30% cholesterol                       | DOPC:DOPE:DOPS:PI(3)P:cholesterol:DOPE Atto-647n                      | 29:20:20:1:30:0.05     |
| # 5         | 1% PI(3)P / 30% cholesterol / 1% TF-cholesterol   | DOPC:DOPE:DOPS:PI(3)P:cholesterol:TopFluor-cholesterol:DOPE Atto-647n | 29:20:20:1:29:1:0.05   |
| # 6         | 1% PI(3)P / 30% cholesterol / 0.1% TF-cholesterol | DOPC:DOPE:DOPS:PI(3)P:cholesterol:TopFluor-cholesterol:DOPE Atto-647n | 29:20:20:1:30:0.1:0.05 |
| # 7         | 100% DOPC                                         | DOPC:DOPE Atto-647n                                                   | 100:0.05               |



**Supplementary Table 3** Data collection and processing statistics for the StA

|                                            |                                             |
|--------------------------------------------|---------------------------------------------|
| Microscope                                 | Titan Krios G4                              |
| Magnification                              | 42,000                                      |
| Voltage (kV)                               | 300                                         |
| Cs (mm)                                    | 2.7                                         |
| Total electron dose ( $e^-/\text{\AA}^2$ ) | $\leq 120$                                  |
| Defocus range ( $\mu\text{m}$ )            | 3.5 – 4.1 (determined with ctfplotter)      |
| Camera                                     | Falcon 4 with Selectris energy filter       |
| Pixel size ( $\text{\AA}$ )                | 2.97 (data collection)<br>5.94 (processing) |
| Number of tomograms                        | 8                                           |
| Symmetry imposed                           | C6                                          |
| Initial number of particles                | 1809                                        |
| Final number of particles                  | 440                                         |
| Refinement method                          | Non-independent half-sets                   |
| Map resolution ( $\text{\AA}$ )            | 44                                          |
| FSC threshold                              | 0.5                                         |

**Supplementary Table 4.** Antibodies and dilutions used in immunofluorescence imaging (IF) and in Western blot (IB) in this study.

| Target | Antibody name       | Source                                            | Catalog number | Host species | Dilution in IF | Dilution in WB |
|--------|---------------------|---------------------------------------------------|----------------|--------------|----------------|----------------|
| HRS    | Anti-HGS            | Abcam                                             | Ab72053        | Rabbit       | 1/300          | 1/1000         |
| EEA1   | Anti-EEA1           | BD Biosciences                                    | 610457         | Mouse        | 1/300          | -              |
| LBPA   | LBPA antibody serum | Jean Gruenberg lab,<br>University of Geneva       | -              | Mouse        | 1/100          | -              |
| LAMP1  | Anti-LAMP1 (H4A3)   | Developmental Studies<br>Hybridoma Bank<br>(DSHB) | H4A3           | Mouse        | 1/500          | -              |
| Actin  | Anti-actin          | Sigma-Aldrich                                     | A2066          | Rabbit       | -              | 1/1000         |

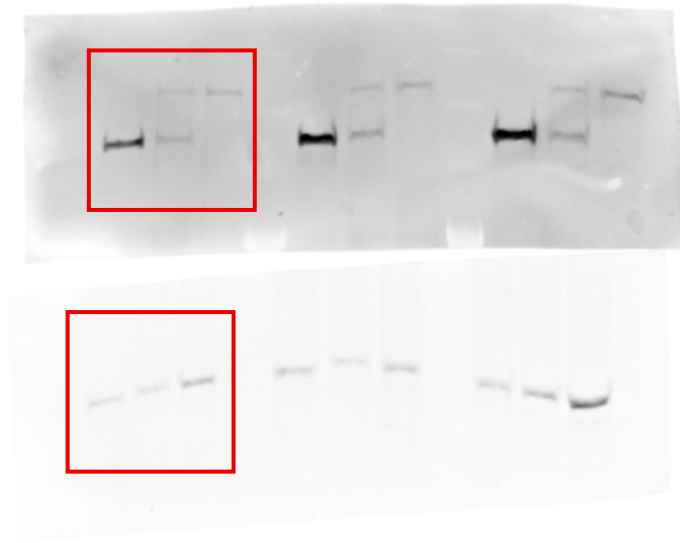

**Original Western blots of Scarlet-HRS cell lines in Extended data figure 2b.** Blots cropped for the figure are indicated with red boxes. The upper blot is an anti-HRS, and the lower is an anti-actin blot. Three independent samples of three different cell lines were blotted simultaneously.
